# Supplementary material for: Drosophila embryos allocate lipid droplets to specific lineages to ensure punctual development and redox homeostasis
Source: PubMed Central journal article supplement (PMC10449164; doi:10.1371/journal.pgen.1010875), 2023-08-14
Supplement: pgen.1010875.s008.pdf [file pgen.1010875.s008.pdf]

# Biological Process

| Term                | Overlap | P-value        | Adjusted P-value | Old P-value    | Old Adjusted P-v | Z-score      | Combined Score | Genes                  |
|---------------------|---------|----------------|------------------|----------------|------------------|--------------|----------------|------------------------|
| response to copp    | 2/7     | 0.000629503970 | 0.08782471169    | 0.001646962864 | 0.2328092005     | -4.280103473 | 31.5468382     | CG10505;Grx1           |
| peptide metaboli    | 4/72    | 0.000691533162 | 0.08782471169    | 0.001833143311 | 0.2328092005     | -2.70619047  | 19.69186408    | GstD9;GstT4;CG7791;Psa |
| regulation of prim  | 2/15    | 0.003057496538 | 0.1728569705     | 0.006004592906 | 0.237659562      | -3.267188341 | 18.9175394     | Gabat;bwa              |
| purine ribonuclec   | 1/6     | 0.03284541638  | 0.1728569705     | 0.04755123139  | 0.237659562      | -5.40459602  | 18.46179235    | w                      |
| ocellus pigment t   | 2/20    | 0.005433447565 | 0.1728569705     | 0.009975592665 | 0.237659562      | -3.362278098 | 17.53489032    | w;mal                  |
| ommochrome me       | 2/20    | 0.005433447565 | 0.1728569705     | 0.009975592665 | 0.237659562      | -3.150778705 | 16.43188261    | w;mal                  |
| tetrahydrobiopter   | 1/6     | 0.03284541638  | 0.1728569705     | 0.04755123139  | 0.237659562      | -4.803386791 | 16.40809585    | pr                     |
| temperature com     | 1/6     | 0.03284541638  | 0.1728569705     | 0.04755123139  | 0.237659562      | -4.762098521 | 16.26705747    | Ir25a                  |
| positive regulatio  | 1/6     | 0.03284541638  | 0.1728569705     | 0.04755123139  | 0.237659562      | -4.623325675 | 15.79301732    | GILT2                  |
| malate transmem     | 1/7     | 0.03821473511  | 0.1728569705     | 0.05416045197  | 0.237659562      | -4.832840037 | 15.77697111    | Bmcp                   |
| regulation of defe  | 1/7     | 0.03821473511  | 0.1728569705     | 0.05416045197  | 0.237659562      | -4.825147646 | 15.75185904    | Bmcp                   |
| succinate transm    | 1/7     | 0.03821473511  | 0.1728569705     | 0.05416045197  | 0.237659562      | -4.820259892 | 15.7359028     | Bmcp                   |
| thiosulfate transp  | 1/7     | 0.03821473511  | 0.1728569705     | 0.05416045197  | 0.237659562      | -4.814663913 | 15.71763453    | Bmcp                   |
| pteridine metabo    | 1/6     | 0.03284541638  | 0.1728569705     | 0.04755123139  | 0.237659562      | -4.522294405 | 15.44790026    | pr                     |
| aminergic neurot    | 1/6     | 0.03284541638  | 0.1728569705     | 0.04755123139  | 0.237659562      | -4.427507666 | 15.12411416    | w                      |
| regulation of defe  | 1/8     | 0.04355451225  | 0.1728569705     | 0.0607246381   | 0.237659562      | -4.798211302 | 15.03635614    | GILT2                  |
| positive regulatio  | 1/7     | 0.03821473511  | 0.1728569705     | 0.05416045197  | 0.237659562      | -4.582950047 | 14.96119671    | rk                     |
| mitochondrial cal   | 1/6     | 0.03284541638  | 0.1728569705     | 0.04755123139  | 0.237659562      | -4.364971148 | 14.91049297    | MCU                    |
| positive regulatio  | 1/7     | 0.03821473511  | 0.1728569705     | 0.05416045197  | 0.237659562      | -4.500514859 | 14.69208423    | GILT2                  |
| response to zinc    | 1/6     | 0.03284541638  | 0.1728569705     | 0.04755123139  | 0.237659562      | -4.11112074  | 14.04335442    | CG10505                |
| amine transport (   | 1/6     | 0.03284541638  | 0.1728569705     | 0.04755123139  | 0.237659562      | -4.000371429 | 13.66504108    | w                      |
| purine ribonuclec   | 1/7     | 0.03821473511  | 0.1728569705     | 0.05416045197  | 0.237659562      | -4.17381554  | 13.62556316    | Adk3                   |
| negative regulati   | 1/6     | 0.03284541638  | 0.1728569705     | 0.04755123139  | 0.237659562      | -3.94559769  | 13.47793711    | Fs                     |
| positive regulatio  | 1/8     | 0.04355451225  | 0.1728569705     | 0.0607246381   | 0.237659562      | -4.295394249 | 13.46065724    | GILT2                  |
| activation of ader  | 1/6     | 0.03284541638  | 0.1728569705     | 0.04755123139  | 0.237659562      | -3.9004715   | 13.32378861    | rk                     |
| de novo' pyrimidi   | 1/9     | 0.04886490887  | 0.177495799      | 0.06724409102  | 0.237659562      | -4.377818882 | 13.21530325    | Dhod                   |
| mitochondrial cal   | 1/6     | 0.03284541638  | 0.1728569705     | 0.04755123139  | 0.237659562      | -3.806161848 | 13.00163221    | MCU                    |
| monocarboxylic a    | 1/7     | 0.03821473511  | 0.1728569705     | 0.05416045197  | 0.237659562      | -3.910209317 | 12.76501166    | Gabat                  |
| glycerolipid cata   | 1/7     | 0.03821473511  | 0.1728569705     | 0.05416045197  | 0.237659562      | -3.910033217 | 12.76443678    | CG11619                |
| cytosolic calcium   | 1/6     | 0.03284541638  | 0.1728569705     | 0.04755123139  | 0.237659562      | -3.727983969 | 12.73458103    | MCU                    |
| succinate transp    | 1/9     | 0.04886490887  | 0.177495799      | 0.06724409102  | 0.237659562      | -4.137218378 | 12.48900353    | Bmcp                   |
| pyrimidine nuclec   | 1/9     | 0.04886490887  | 0.177495799      | 0.06724409102  | 0.237659562      | -4.087595809 | 12.3392081     | Dhod                   |
| neurotransmitter    | 2/25    | 0.008425684258 | 0.1728569705     | 0.01482651823  | 0.237659562      | -2.560180692 | 12.22862778    | CG13795;CG13796        |
| microtubule bund    | 2/22    | 0.006558381144 | 0.1728569705     | 0.01181395033  | 0.237659562      | -2.422224226 | 12.176549      | pav;l(2)41Ab           |
| pteridine-containi  | 1/10    | 0.05414608515  | 0.177495799      | 0.07371910995  | 0.237659562      | -4.125666936 | 12.03073195    | pr                     |
| regulation of tran  | 1/8     | 0.04355451225  | 0.1728569705     | 0.0607246381   | 0.237659562      | -3.82421368  | 11.98409891    | udd                    |
| aromatic compou     | 2/27    | 0.009787248028 | 0.1728569705     | 0.0169991333   | 0.237659562      | -2.56834605  | 11.88290236    | w;mal                  |
| regulation of autc  | 1/8     | 0.04355451225  | 0.1728569705     | 0.0607246381   | 0.237659562      | -3.757769775 | 11.77588086    | SREBP                  |
| modification-dep    | 1/7     | 0.03821473511  | 0.1728569705     | 0.05416045197  | 0.237659562      | -3.591618698 | 11.72496172    | Ubi-p5E                |
| response to mete    | 2/21    | 0.00598373337  | 0.1728569705     | 0.01087743378  | 0.237659562      | -2.282399308 | 11.68294152    | CG10505;Grx1           |
| nucleobase-conti    | 1/11    | 0.05939820044  | 0.177495799      | 0.08014999217  | 0.237659562      | -4.126039925 | 11.64983803    | DNasell                |
| heterocycle biosy   | 2/29    | 0.01123962382  | 0.1728569705     | 0.01929861521  | 0.237659562      | -2.590610231 | 11.62746156    | w;mal                  |
| GTP metabolic p     | 1/6     | 0.03284541638  | 0.1728569705     | 0.04755123139  | 0.237659562      | -3.388860448 | 11.57615438    | mal                    |
| phosphate ion tra   | 1/10    | 0.05414608515  | 0.177495799      | 0.07371910995  | 0.237659562      | -3.946874138 | 11.50935971    | Bmcp                   |
| malate transport    | 1/10    | 0.05414608515  | 0.177495799      | 0.07371910995  | 0.237659562      | -3.845435585 | 11.21355782    | Bmcp                   |
| mitochondrial prc   | 1/8     | 0.04355451225  | 0.1728569705     | 0.0607246381   | 0.237659562      | -3.501297147 | 10.97216182    | CG7791                 |
| phosphate ion tra   | 1/11    | 0.05939820044  | 0.177495799      | 0.08014999217  | 0.237659562      | -3.815144424 | 10.77202727    | Bmcp                   |
| trehalose metabo    | 1/7     | 0.03821473511  | 0.1728569705     | 0.05416045197  | 0.237659562      | -3.297826633 | 10.76586751    | CG5171                 |
| organic cyclic coi  | 2/31    | 0.01278067165  | 0.1728569705     | 0.02172117615  | 0.237659562      | -2.445687398 | 10.66275995    | w;mal                  |
| sphingolipid cata   | 1/7     | 0.03821473511  | 0.1728569705     | 0.05416045197  | 0.237659562      | -3.196289329 | 10.43439551    | bwa                    |
| sodium ion trans    | 2/27    | 0.009787248028 | 0.1728569705     | 0.0169991333   | 0.237659562      | -2.209109309 | 10.22083073    | CG13795;CG13796        |
| regulation of mic   | 1/10    | 0.05414608515  | 0.177495799      | 0.07371910995  | 0.237659562      | -3.457053099 | 10.08100746    | pav                    |
| phospholipid cata   | 1/8     | 0.04355451225  | 0.1728569705     | 0.0607246381   | 0.237659562      | -3.1621024   | 9.909213006    | CG11619                |
| cellular biogenic   | 1/7     | 0.03821473511  | 0.1728569705     | 0.05416045197  | 0.237659562      | -2.925558176 | 9.550584431    | w                      |
| cellular response   | 2/31    | 0.01278067165  | 0.1728569705     | 0.02172117615  | 0.237659562      | -2.161965404 | 9.425782765    | Prx2540-1;Grx1         |
| coenzyme metab      | 1/9     | 0.04886490887  | 0.177495799      | 0.06724409102  | 0.237659562      | -3.12036906  | 9.419444822    | mal                    |
| monocarboxylic a    | 2/34    | 0.01525390951  | 0.1728569705     | 0.02557769441  | 0.237659562      | -2.243277268 | 9.383448112    | CG4830;SREBP           |
| mitotic spindle el  | 1/10    | 0.05414608515  | 0.177495799      | 0.07371910995  | 0.237659562      | -3.216769927 | 9.380325009    | pav                    |
| actomyosin contr    | 1/12    | 0.06462141319  | 0.1779940862     | 0.086537033    | 0.237659562      | -3.416667337 | 9.358967456    | pav                    |
| regulation of lipid | 1/12    | 0.06462141319  | 0.1779940862     | 0.086537033    | 0.237659562      | -3.401764868 | 9.318146471    | bwa                    |
| contractile ring c  | 1/12    | 0.06462141319  | 0.1779940862     | 0.086537033    | 0.237659562      | -3.378911096 | 9.255545204    | pav                    |
| neurotransmitter    | 1/8     | 0.04355451225  | 0.1728569705     | 0.0607246381   | 0.237659562      | -2.924198398 | 9.163883249    | w                      |
| protein modificati  | 1/10    | 0.05414608515  | 0.177495799      | 0.07371910995  | 0.237659562      | -3.129250354 | 9.125111843    | Ubi-p5E                |
| positive regulatio  | 1/10    | 0.05414608515  | 0.177495799      | 0.07371910995  | 0.237659562      | -3.121893293 | 9.103658139    | udd                    |
| determination of    | 1/11    | 0.05939820044  | 0.177495799      | 0.08014999217  | 0.237659562      | -3.215011317 | 9.07755664     | l(2)41Ab               |
| hydrogen peroxic    | 1/12    | 0.06462141319  | 0.1779940862     | 0.086537033    | 0.237659562      | -3.313374226 | 9.076025989    | Prx2540-1              |
| cellular macromc    | 1/14    | 0.07498176072  | 0.1779940862     | 0.09918076211  | 0.237659562      | -3.483168101 | 9.023183139    | DNasell                |
| apoptotic DNA fra   | 1/11    | 0.05939820044  | 0.177495799      | 0.08014999217  | 0.237659562      | -3.188233793 | 9.001950533    | DNasell                |
| ceramide metabo     | 1/11    | 0.05939820044  | 0.177495799      | 0.08014999217  | 0.237659562      | -3.185918512 | 8.995413356    | bwa                    |

|                     |      |                |              |                |              |              |             |                       |  |
|---------------------|------|----------------|--------------|----------------|--------------|--------------|-------------|-----------------------|--|
| tetrahydrobiopter   | 1/6  | 0.03284541638  | 0.1728569705 | 0.04755123139  | 0.237659562  | -2.608457005 | 8.910340644 | pr                    |  |
| glycerophospholi    | 1/6  | 0.03284541638  | 0.1728569705 | 0.04755123139  | 0.237659562  | -2.596265944 | 8.868696674 | CG11619               |  |
| apoptotic nuclear   | 1/11 | 0.05939820044  | 0.177495799  | 0.08014999217  | 0.237659562  | -3.1001822   | 8.753337622 | DNasell               |  |
| ommochrome bic      | 2/20 | 0.005433447565 | 0.1728569705 | 0.009975592665 | 0.237659562  | -1.661632197 | 8.665713388 | w;mal                 |  |
| regulation of cell  | 1/13 | 0.06981588103  | 0.1779940862 | 0.09288052583  | 0.237659562  | -3.207079204 | 8.536904164 | SREBP                 |  |
| fatty acid biosynt  | 3/57 | 0.003915629681 | 0.1728569705 | 0.008164597583 | 0.237659562  | -1.505626356 | 8.345354335 | CG4830;SREBP;CG9458   |  |
| eye pigment bios    | 2/39 | 0.01979001567  | 0.1728569705 | 0.03256912583  | 0.237659562  | -2.122516636 | 8.325736485 | w;mal                 |  |
| regulation of micr  | 1/13 | 0.06981588103  | 0.1779940862 | 0.09288052583  | 0.237659562  | -3.062589252 | 8.152287261 | pav                   |  |
| regulation of lipid | 1/6  | 0.03284541638  | 0.1728569705 | 0.04755123139  | 0.237659562  | -2.304616199 | 7.872437749 | SREBP                 |  |
| cholesterol trans   | 1/14 | 0.07498176072  | 0.1779940862 | 0.09918076211  | 0.237659562  | -2.964220576 | 7.678844186 | w                     |  |
| sphingolipid met    | 2/38 | 0.01884256235  | 0.1728569705 | 0.03111649437  | 0.237659562  | -1.932895734 | 7.676760241 | CG9458;bwa            |  |
| protein processin   | 1/6  | 0.03284541638  | 0.1728569705 | 0.04755123139  | 0.237659562  | -2.23747723  | 7.643094852 | CG7791                |  |
| carboxylic acid tr  | 1/13 | 0.06981588103  | 0.1779940862 | 0.09288052583  | 0.237659562  | -2.86937991  | 7.637984514 | Sln                   |  |
| cellular amide me   | 1/11 | 0.05939820044  | 0.177495799  | 0.08014999217  | 0.237659562  | -2.626711359 | 7.416496797 | CG7791                |  |
| sulfur compound     | 1/14 | 0.07498176072  | 0.1779940862 | 0.09918076211  | 0.237659562  | -2.784849946 | 7.214182708 | Bmcp                  |  |
| eye pigment met     | 1/12 | 0.06462141319  | 0.1779940862 | 0.086537033    | 0.237659562  | -2.633496937 | 7.213699695 | w                     |  |
| stabilization of m  | 1/15 | 0.08011920815  | 0.1850025352 | 0.1054380314   | 0.2456996327 | -2.842051611 | 7.174019369 | CG42340               |  |
| membrane lipid n    | 1/14 | 0.07498176072  | 0.1779940862 | 0.09918076211  | 0.237659562  | -2.751307207 | 7.127289895 | bwa                   |  |
| fatty acid metabo   | 2/42 | 0.02274914506  | 0.1728569705 | 0.03708324264  | 0.237659562  | -1.858926712 | 7.032743054 | CG4830;SREBP          |  |
| axoneme assembl     | 1/14 | 0.07498176072  | 0.1779940862 | 0.09918076211  | 0.237659562  | -2.712602663 | 7.027025369 | l(2)41Ab              |  |
| oligosaccharide c   | 1/11 | 0.05939820044  | 0.177495799  | 0.08014999217  | 0.237659562  | -2.480097295 | 7.002533256 | Mal-A4                |  |
| transmembrane t     | 3/75 | 0.00840892425  | 0.1728569705 | 0.01663347516  | 0.237659562  | -1.455714294 | 6.956075039 | CG10505;nAChRalpha3;w |  |
| sulfate transport   | 1/16 | 0.08522837843  | 0.1882435489 | 0.1116526213   | 0.2466066592 | -2.801567965 | 6.898639286 | Bmcp                  |  |
| regulation of cell  | 1/18 | 0.09536250357  | 0.1968225749 | 0.1239549041   | 0.2575834274 | -2.846428021 | 6.689304593 | GluRIIC               |  |
| regulation of dev   | 1/13 | 0.06981588103  | 0.1779940862 | 0.09288052583  | 0.237659562  | -2.502095171 | 6.660311554 | Hr3                   |  |
| C4-dicarboxylate    | 1/16 | 0.08522837843  | 0.1882435489 | 0.1116526213   | 0.2466066592 | -2.703628668 | 6.657471523 | Bmcp                  |  |
| anesthesia-resist   | 1/14 | 0.07498176072  | 0.1779940862 | 0.09918076211  | 0.237659562  | -2.554020148 | 6.616215719 | MCU                   |  |
| glycerophospholi    | 1/15 | 0.08011920815  | 0.1850025352 | 0.1054380314   | 0.2456996327 | -2.560578739 | 6.463514383 | CG11619               |  |
| regulation of dec   | 1/12 | 0.06462141319  | 0.1779940862 | 0.086537033    | 0.237659562  | -2.337858662 | 6.40388454  | Fs                    |  |
| regulation of chiti | 1/14 | 0.07498176072  | 0.1779940862 | 0.09918076211  | 0.237659562  | -2.469635197 | 6.397615625 | rk                    |  |
| calcium ion impo    | 1/8  | 0.04355451225  | 0.1728569705 | 0.0607246381   | 0.237659562  | -2.03441057  | 6.375317789 | MCU                   |  |
| mitochondrial tra   | 1/14 | 0.07498176072  | 0.1779940862 | 0.09918076211  | 0.237659562  | -2.458647025 | 6.369150652 | MCU                   |  |
| lipid biosynthetic  | 2/46 | 0.02695818018  | 0.1728569705 | 0.04345117767  | 0.237659562  | -1.750949632 | 6.327001332 | CG4830;SREBP          |  |
| regulation of tran  | 1/21 | 0.1103554414   | 0.1978765693 | 0.1420953162   | 0.2575834274 | -2.838198257 | 6.255527568 | GluRIIC               |  |
| regulation of mitc  | 1/15 | 0.08011920815  | 0.1850025352 | 0.1054380314   | 0.2456996327 | -2.467011858 | 6.227329154 | SREBP                 |  |
| synaptic transmis   | 1/14 | 0.07498176072  | 0.1779940862 | 0.09918076211  | 0.237659562  | -2.403874541 | 6.227261964 | GluRIIC               |  |
| copper ion home     | 1/16 | 0.08522837843  | 0.1882435489 | 0.1116526213   | 0.2466066592 | -2.462991185 | 6.064920774 | Grx1                  |  |
| axonemal dynein     | 1/19 | 0.1003877644   | 0.1978765693 | 0.1300431629   | 0.2575834274 | -2.540172211 | 5.839131831 | l(2)41Ab              |  |
| glutathione metal   | 2/47 | 0.0280559328   | 0.1728569705 | 0.04510281606  | 0.237659562  | -1.629197014 | 5.8220254   | GstD9;GstI4           |  |
| cellular response   | 1/16 | 0.08522837843  | 0.1882435489 | 0.1116526213   | 0.2466066592 | -2.350572935 | 5.788099735 | Hsc70-1               |  |
| response to unfol   | 1/16 | 0.08522837843  | 0.1882435489 | 0.1116526213   | 0.2466066592 | -2.347314742 | 5.780076692 | Hsc70-1               |  |
| organonitrogen c    | 2/53 | 0.03500705226  | 0.1728569705 | 0.05548383562  | 0.237659562  | -1.71188866  | 5.738603    | CG9458;mal            |  |
| cofactor biosynth   | 1/20 | 0.10538536     | 0.1978765693 | 0.1360898742   | 0.2575834274 | -2.506255218 | 5.639403943 | mal                   |  |
| regulation of circ  | 1/19 | 0.1003877644   | 0.1978765693 | 0.1300431629   | 0.2575834274 | -2.453019776 | 5.638793225 | Gabat                 |  |
| SREBP signaling     | 1/7  | 0.03821473511  | 0.1728569705 | 0.05416045197  | 0.237659562  | -1.714370263 | 5.596620187 | SREBP                 |  |
| DNA catabolic pr    | 1/21 | 0.1103554414   | 0.1978765693 | 0.1420953162   | 0.2575834274 | -2.460616279 | 5.423318449 | DNasell               |  |
| compound eye pi     | 1/14 | 0.07498176072  | 0.1779940862 | 0.09918076211  | 0.237659562  | -2.091305041 | 5.417547429 | w                     |  |
| glucose transport   | 1/21 | 0.1103554414   | 0.1978765693 | 0.1420953162   | 0.2575834274 | -2.402576722 | 5.29539643  | Tret1-1               |  |
| cellular response   | 1/17 | 0.09030942576  | 0.1927612953 | 0.1178248176   | 0.2557906296 | -2.188984693 | 5.263443117 | Hsc70-1               |  |
| hydrogen peroxic    | 1/13 | 0.06981588103  | 0.1779940862 | 0.09288052583  | 0.237659562  | -1.953962011 | 5.201239311 | Prx2540-1             |  |
| translational elon  | 1/20 | 0.10538536     | 0.1978765693 | 0.1360898742   | 0.2575834274 | -2.308431726 | 5.194275062 | eEF1delta             |  |
| medium-term me      | 1/18 | 0.09536250357  | 0.1968225749 | 0.1239549041   | 0.2575834274 | -2.183877739 | 5.13226517  | MCU                   |  |
| macromolecule n     | 1/19 | 0.1003877644   | 0.1978765693 | 0.1300431629   | 0.2575834274 | -2.151807325 | 4.946391664 | rgr                   |  |
| actomyosin contr    | 1/21 | 0.1103554414   | 0.1978765693 | 0.1420953162   | 0.2575834274 | -2.213241508 | 4.878092373 | pav                   |  |
| sodium ion trans    | 2/63 | 0.04788244957  | 0.177495799  | 0.07441395931  | 0.237659562  | -1.598858319 | 4.858940406 | CG13795;CG13796       |  |
| inorganic anion t   | 1/26 | 0.1347983592   | 0.2153382594 | 0.1715131007   | 0.2757235923 | -2.410050615 | 4.829681789 | Bmcp                  |  |
| DNA catabolic pr    | 1/22 | 0.1152981585   | 0.1978765693 | 0.1480597654   | 0.2575834274 | -2.200486363 | 4.753565068 | DNasell               |  |
| positive regulatio  | 1/7  | 0.03821473511  | 0.1728569705 | 0.05416045197  | 0.237659562  | -1.449337582 | 4.731411962 | udd                   |  |
| chaperone media     | 1/22 | 0.1152981585   | 0.1978765693 | 0.1480597654   | 0.2575834274 | -2.18069458  | 4.71081019  | Hsc70-1               |  |
| de novo' posttran   | 1/22 | 0.1152981585   | 0.1978765693 | 0.1480597654   | 0.2575834274 | -2.173768512 | 4.695848263 | Hsc70-1               |  |
| assembly of acto    | 1/22 | 0.1152981585   | 0.1978765693 | 0.1480597654   | 0.2575834274 | -2.173673509 | 4.695643034 | pav                   |  |
| calcium ion trans   | 1/24 | 0.1251020967   | 0.2090521879 | 0.1598667823   | 0.2689149848 | -2.213407756 | 4.600844922 | MCU                   |  |
| monocarboxylic a    | 1/17 | 0.09030942576  | 0.1927612953 | 0.1178248176   | 0.2557906296 | -1.912718341 | 4.599156961 | Sln                   |  |
| inorganic cation t  | 2/79 | 0.07138717984  | 0.1779940862 | 0.1081892722   | 0.2466066592 | -1.714846806 | 4.526573045 | CG13795;CG13796       |  |
| fatty acid elongat  | 1/21 | 0.1103554414   | 0.1978765693 | 0.1420953162   | 0.2575834274 | -2.043913467 | 4.5048851   | CG9458                |  |
| coenzyme biosyn     | 1/24 | 0.1251020967   | 0.2090521879 | 0.1598667823   | 0.2689149848 | -2.163385672 | 4.496867763 | pr                    |  |
| organophosphate     | 1/22 | 0.1152981585   | 0.1978765693 | 0.1480597654   | 0.2575834274 | -2.058363866 | 4.446547244 | mal                   |  |
| actomyosin contr    | 1/23 | 0.1202136608   | 0.2035617989 | 0.1539834964   | 0.2624953563 | -2.056574707 | 4.356821872 | pav                   |  |
| peptide catabolic   | 1/20 | 0.10538536     | 0.1978765693 | 0.1360898742   | 0.2575834274 | -1.93415803  | 4.352110009 | Psa                   |  |
| transition metal i  | 1/21 | 0.1103554414   | 0.1978765693 | 0.1420953162   | 0.2575834274 | -1.923042829 | 4.238480313 | Grx1                  |  |

|                        |       |               |              |               |              |               |             |                            |  |
|------------------------|-------|---------------|--------------|---------------|--------------|---------------|-------------|----------------------------|--|
| fatty acid elongat     | 1/21  | 0.1103554414  | 0.1978765693 | 0.1420953162  | 0.2575834274 | -1.914850174  | 4.2204233   | CG9458                     |  |
| very long-chain f      | 1/22  | 0.1152981585  | 0.1978765693 | 0.1480597654  | 0.2575834274 | -1.933815341  | 4.177493308 | CG9458                     |  |
| fatty acid elongat     | 1/21  | 0.1103554414  | 0.1978765693 | 0.1420953162  | 0.2575834274 | -1.88863707   | 4.162648339 | CG9458                     |  |
| fatty acid elongat     | 1/22  | 0.1152981585  | 0.1978765693 | 0.1480597654  | 0.2575834274 | -1.923295961  | 4.154768986 | CG9458                     |  |
| negative regulati      | 1/25  | 0.1299636138  | 0.2129726317 | 0.1657098939  | 0.2733137212 | -2.022656752  | 4.127232641 | Fs                         |  |
| covalent chromal       | 1/20  | 0.10538536    | 0.1978765693 | 0.1360898742  | 0.2575834274 | -1.832178521  | 4.122642699 | rgr                        |  |
| glucose import (C      | 1/21  | 0.1103554414  | 0.1978765693 | 0.1420953162  | 0.2575834274 | -1.864552076  | 4.109563836 | Tret1-1                    |  |
| cAMP-mediated r        | 1/26  | 0.1347983592  | 0.2153382594 | 0.1715131007  | 0.2757235923 | -1.951684305  | 3.911127049 | rk                         |  |
| regulation of hist     | 1/27  | 0.1396064789  | 0.2202487307 | 0.1772766701  | 0.2814267137 | -1.947340639  | 3.834172886 | rgr                        |  |
| ion transport (GC 2/68 |       | 0.05487037915 | 0.177495799  | 0.08455139395 | 0.237659562  | -1.319489861  | 3.830190915 | MFS15;nAChRalpha3          |  |
| very long-chain f      | 1/25  | 0.1299636138  | 0.2129726317 | 0.1657098939  | 0.2733137212 | -1.828420234  | 3.730892879 | CG9458                     |  |
| regulation of hist     | 1/27  | 0.1396064789  | 0.2202487307 | 0.1772766701  | 0.2814267137 | -1.880134039  | 3.701847951 | rgr                        |  |
| carbohydrate cat       | 1/32  | 0.1632527498  | 0.2396890084 | 0.2055091966  | 0.3034845112 | -2.006676686  | 3.637012531 | Mal-A4                     |  |
| smoothened sign        | 1/29  | 0.1491434215  | 0.2309904211 | 0.1886859579  | 0.2938117826 | -1.908609043  | 3.631790753 | pav                        |  |
| hexose metabolic       | 1/26  | 0.1347983592  | 0.2153382594 | 0.1715131007  | 0.2757235923 | -1.805174784  | 3.617525594 | Gal                        |  |
| positive regulatio     | 1/26  | 0.1347983592  | 0.2153382594 | 0.1715131007  | 0.2757235923 | -1.801114641  | 3.609389169 | Fs                         |  |
| homeostasis of n       | 1/30  | 0.1538725327  | 0.2312640433 | 0.1943322027  | 0.2938117826 | -1.903691392  | 3.563007308 | rk                         |  |
| intestinal stem ce     | 1/30  | 0.1538725327  | 0.2312640433 | 0.1943322027  | 0.2938117826 | -1.878376453  | 3.51562709  | rk                         |  |
| cilium movement        | 1/31  | 0.1585755948  | 0.2355450355 | 0.1999398626  | 0.2987336771 | -1.909041631  | 3.515545714 | l(2)41Ab                   |  |
| fatty acid elongat     | 1/21  | 0.1103554414  | 0.1978765693 | 0.1420953162  | 0.2575834274 | -1.592185159  | 3.509253848 | CG9458                     |  |
| anion transport (C     | 1/28  | 0.1443881181  | 0.2263863087 | 0.1830008678  | 0.2887094436 | -1.789016023  | 3.462193867 | MFS15                      |  |
| cellular calcium i     | 1/30  | 0.1538725327  | 0.2312640433 | 0.1943322027  | 0.2938117826 | -1.846591793  | 3.456137943 | CG9458                     |  |
| organic anion tra      | 1/30  | 0.1538725327  | 0.2312640433 | 0.1943322027  | 0.2938117826 | -1.812963661  | 3.393198498 | w                          |  |
| inorganic anion t      | 1/37  | 0.186254843   | 0.2571126638 | 0.2327899168  | 0.3231073162 | -1.991861468  | 3.347600901 | Bmcp                       |  |
| adenylate cyclasi      | 1/29  | 0.1491434215  | 0.2309904211 | 0.1886859579  | 0.2938117826 | -1.75467292   | 3.338873884 | rk                         |  |
| membrane lipid t       | 1/32  | 0.1632527498  | 0.2396890084 | 0.2055091966  | 0.3034845112 | -1.835331433  | 3.326456856 | CG9458                     |  |
| protein maturatio      | 1/37  | 0.186254843   | 0.2571126638 | 0.2327899168  | 0.3231073162 | -1.97571865   | 3.320470645 | CG7791                     |  |
| regulation of cyto     | 1/33  | 0.1679041393  | 0.243700865  | 0.2110404617  | 0.3063101558 | -1.800700626  | 3.213101882 | pav                        |  |
| organonitrogen c       | 1/30  | 0.1538725327  | 0.2312640433 | 0.1943322027  | 0.2938117826 | -1.697723878  | 3.177512178 | Psa                        |  |
| divalent metal ior     | 1/36  | 0.1817051169  | 0.2564061095 | 0.2274083896  | 0.3226912345 | -1.860786178  | 3.17332919  | GluRIIC                    |  |
| ion transmembra        | 1/31  | 0.1585755948  | 0.2355450355 | 0.1999398626  | 0.2987336771 | -1.718558998  | 3.164767402 | nAChRalpha3                |  |
| purine ribonucle       | 1/33  | 0.1679041393  | 0.243700865  | 0.2110404617  | 0.3063101558 | -1.747044829  | 3.117360513 | Adk3                       |  |
| anterograde tran       | 2/89  | 0.08760368325 | 0.1918218582 | 0.131009941   | 0.2575834274 | -1.241091868  | 3.021974596 | nAChRalpha3;GluRIIC        |  |
| sphingolipid bios      | 1/37  | 0.186254843   | 0.2571126638 | 0.2327899168  | 0.3231073162 | -1.776349718  | 2.985403358 | CG9458                     |  |
| cation transport (     | 1/37  | 0.186254843   | 0.2571126638 | 0.2327899168  | 0.3231073162 | -1.768078809  | 2.971502942 | nAChRalpha3                |  |
| oligosaccharide r      | 1/23  | 0.1202136608  | 0.2035617989 | 0.1539834964  | 0.2624953563 | -1.384265595  | 2.932545363 | Mal-A4                     |  |
| mitotic spindle as     | 1/34  | 0.1725299038  | 0.2475910422 | 0.2165339133  | 0.3124978067 | -1.651791884  | 2.90250343  | pav                        |  |
| regulation of cell     | 1/38  | 0.1907794993  | 0.2619350963 | 0.2381346356  | 0.3287293339 | -1.737012501  | 2.87759913  | GluRIIC                    |  |
| negative regulati      | 1/35  | 0.1771301833  | 0.2527588009 | 0.2219898053  | 0.3185616415 | -1.613709828  | 2.793122444 | pav                        |  |
| regulation of BMI      | 1/42  | 0.2086301522  | 0.2731549415 | 0.2591503447  | 0.3410579665 | -1.762389486  | 2.762003059 | GluRIIC                    |  |
| mitochondrial ger      | 2/94  | 0.09608661138 | 0.1968225749 | 0.1428101533  | 0.2575834274 | -1.158165037  | 2.713007729 | mRpl45;mlF2                |  |
| positive regulatio     | 1/42  | 0.2086301522  | 0.2731549415 | 0.2591503447  | 0.3410579665 | -1.711962548  | 2.682974354 | GILT2                      |  |
| glucose homeost        | 1/36  | 0.1817051169  | 0.2564061095 | 0.2274083896  | 0.3226912345 | -1.562520972  | 2.664676612 | Eno                        |  |
| protein processin      | 1/46  | 0.2260905061  | 0.2900352957 | 0.2795965989  | 0.362334368  | -1.761915516  | 2.619651034 | CG7791                     |  |
| carboxylic acid tr     | 1/42  | 0.2086301522  | 0.2731549415 | 0.2591503447  | 0.3410579665 | -1.654603849  | 2.593082249 | Bmcp                       |  |
| calcium ion trans      | 1/42  | 0.2086301522  | 0.2731549415 | 0.2591503447  | 0.3410579665 | -1.638434209  | 2.567741314 | GluRIIC                    |  |
| negative regulati      | 1/40  | 0.1997541489  | 0.2698806055 | 0.2487146347  | 0.3360293469 | -1.561512145  | 2.515077525 | pav                        |  |
| mitochondrial tra      | 2/94  | 0.09608661138 | 0.1968225749 | 0.1428101533  | 0.2575834274 | -1.057071274  | 2.476195053 | mRpl45;mlF2                |  |
| adenylate cyclasi      | 1/40  | 0.1997541489  | 0.2698806055 | 0.2487146347  | 0.3360293469 | -1.516159958  | 2.442030211 | rk                         |  |
| lipid homeostasis      | 1/40  | 0.1997541489  | 0.2698806055 | 0.2487146347  | 0.3360293469 | -1.500580851  | 2.416937443 | SREBP                      |  |
| negative regulati      | 3/192 | 0.09135614842 | 0.1933705142 | 0.1525212506  | 0.2624953563 | -0.9792874036 | 2.343424663 | sug;Hr3;CG42741            |  |
| carbohydrate hor       | 1/41  | 0.2042044139  | 0.2729890586 | 0.2539504045  | 0.3410579665 | -1.444751016  | 2.295180236 | Eno                        |  |
| regulation of mul      | 1/48  | 0.2346769711  | 0.2980397533 | 0.2896109311  | 0.3734069873 | -1.543265667  | 2.237033497 | rk                         |  |
| brain developme        | 1/44  | 0.2174085836  | 0.2803136053 | 0.2694436972  | 0.3509676877 | -1.444359938  | 2.204059788 | bwa                        |  |
| cellular response      | 1/43  | 0.2130314977  | 0.2760714307 | 0.2643146959  | 0.346061509  | -1.415281831  | 2.188471875 | Hsc70-1                    |  |
| proteolysis (GO: 4/305 |       | 0.0900623015  | 0.1927612953 | 0.165483774   | 0.2733137212 | -0.8734064491 | 2.102510827 | CG7791;CG18754;CG14990;Psa |  |
| microtubule cyto       | 1/52  | 0.251567678   | 0.3147694099 | 0.3092312894  | 0.390769888  | -1.446620417  | 1.99639871  | pav                        |  |
| proteolysis invol      | 1/52  | 0.251567678   | 0.3147694099 | 0.3092312894  | 0.390769888  | -1.443387606  | 1.991937292 | Ubi-p5E                    |  |
| translation (GO: 3/225 |       | 0.1298205212  | 0.2129726317 | 0.2096634425  | 0.3063101558 | -0.9383889731 | 1.915817169 | mRpl45;mlF2;eEF1delta      |  |
| positive regulatio     | 2/135 | 0.1725339153  | 0.2475910422 | 0.2455328627  | 0.3360293469 | -1.073464044  | 1.886249637 | SREBP;sug                  |  |
| cellular protein c     | 1/60  | 0.2842486216  | 0.3471112975 | 0.3468892478  | 0.4256515408 | -1.475164027  | 1.855617674 | l(2)41Ab                   |  |
| protein targeting      | 1/52  | 0.251567678   | 0.3147694099 | 0.3092312894  | 0.390769888  | -1.342832067  | 1.853166301 | CG7791                     |  |
| cellular response      | 1/64  | 0.3000547081  | 0.3629233136 | 0.3649548405  | 0.4435336339 | -1.437223876  | 1.730116392 | sug                        |  |
| cell morphogene        | 1/58  | 0.2762134478  | 0.3405738628 | 0.3376681858  | 0.418379118  | -1.336936088  | 1.720077038 | SREBP                      |  |
| neuromuscular s        | 1/59  | 0.2802421464  | 0.3438720057 | 0.3422945827  | 0.4220525437 | -1.305592914  | 1.660846366 | GluRIIC                    |  |
| neuropeptide sig       | 1/57  | 0.2721624036  | 0.3372158562 | 0.3330098418  | 0.4146299011 | -1.25108825   | 1.6281116   | rk                         |  |
| mitotic cytokines      | 1/65  | 0.3039518754  | 0.3658946747 | 0.3693940224  | 0.4467908652 | -1.337909063  | 1.593297031 | pav                        |  |
| cytoskeleton-dep       | 1/69  | 0.3193266742  | 0.379013903  | 0.3868480861  | 0.4634878012 | -1.356919238  | 1.548978459 | pav                        |  |
| sensory percepti       | 1/63  | 0.2961359182  | 0.3598972404 | 0.3604849808  | 0.4402076207 | -1.240219715  | 1.509268945 | Bmcp                       |  |
| modulation of chr      | 1/70  | 0.3231174895  | 0.3817294992 | 0.3911369523  | 0.4664262248 | -1.271374488  | 1.436321696 | GluRIIC                    |  |

|                           |              |              |              |              |               |               |                               |  |
|---------------------------|--------------|--------------|--------------|--------------|---------------|---------------|-------------------------------|--|
| regulation of autc 1/72   | 0.3306364663 | 0.3852369837 | 0.3996265094 | 0.4699311731 | -1.228344704  | 1.359453055   | SREBP                         |  |
| sensory percepti 1/72     | 0.3306364663 | 0.3852369837 | 0.3996265094 | 0.4699311731 | -1.191637765  | 1.31882817    | Bmcp                          |  |
| regulation of can 1/68    | 0.3155148212 | 0.376247721  | 0.3825295619 | 0.4604858233 | -1.128057378  | 1.301270161   | pav                           |  |
| detection of chen 1/73    | 0.3343648561 | 0.3878021619 | 0.4038275962 | 0.4726829928 | -1.180470262  | 1.293231731   | lr25a                         |  |
| ubiquitin-depend 2/164    | 0.2310125824 | 0.2948602811 | 0.3202921011 | 0.4007595747 | -0.8758465222 | 1.283363108   | Rpn7;Ubi-p5E                  |  |
| chemical synapti 2/154    | 0.2106272943 | 0.2743555526 | 0.2945786119 | 0.3778937748 | -0.819725632  | 1.276857996   | nAChRalpha3;GluRIIC           |  |
| modification-dept 1/71    | 0.326887382  | 0.3843953474 | 0.3953963606 | 0.4693022224 | -1.110310403  | 1.241481991   | Ubi-p5E                       |  |
| negative regulati 3/279   | 0.2022604958 | 0.2718209837 | 0.3108489141 | 0.3908694267 | -0.7642325864 | 1.221395625   | sug;Hr3;CG42741               |  |
| peripheral nervo 1/79     | 0.3563069076 | 0.4058383611 | 0.428434698  | 0.49240911   | -1.125059336  | 1.161019405   | pav                           |  |
| mitotic spindle or 1/74   | 0.3380726647 | 0.3903202583 | 0.4079998169 | 0.4753759334 | -1.052138558  | 1.141038398   | pav                           |  |
| cilium assembly ( 1/79    | 0.3563069076 | 0.4058383611 | 0.428434698  | 0.49240911   | -1.010632077  | 1.042934727   | l(2)41Ab                      |  |
| positive regulatio 2/204  | 0.3131111475 | 0.3751426012 | 0.420278118  | 0.4874458538 | -0.8481119792 | 0.9848251263  | SREBP;sug                     |  |
| somatic muscle c 1/85     | 0.3775319622 | 0.4280942786 | 0.4520438533 | 0.5148840302 | -1.006831861  | 0.9807549621  | pav                           |  |
| proteasomal prot 1/94     | 0.408075771  | 0.4586338312 | 0.485672968  | 0.5507184548 | -1.029390273  | 0.9226449807  | Rpn7                          |  |
| endosomal trans 1/96      | 0.414658916  | 0.46397958   | 0.4928662646 | 0.5563912498 | -1.043307605  | 0.9184226263  | Muted                         |  |
| regulation of tran 5/623  | 0.2646392796 | 0.3295018481 | 0.4429287432 | 0.5067743278 | -0.6763106451 | 0.8990789781  | CG10654;SREBP;sug;rgr;CG42741 |  |
| regulation of nucl 2/246  | 0.3972605771 | 0.4484630515 | 0.5170261188 | 0.5734700183 | -0.8978011819 | 0.8288166961  | CG10654;rgr                   |  |
| detection of chen 1/98    | 0.4211694982 | 0.4691975989 | 0.4999607608 | 0.5594274592 | -0.9583224249 | 0.8286804884  | lr25a                         |  |
| male mating behi 1/101    | 0.4308010478 | 0.4778317299 | 0.5104201641 | 0.5686259723 | -0.9799788263 | 0.8252488928  | w                             |  |
| regulation of mac 1/113   | 0.4677645415 | 0.5055838023 | 0.5501518454 | 0.5997363465 | -1.018366614  | 0.7737450002  | rgr                           |  |
| regulation of celli 2/266 | 0.4357239237 | 0.481190768  | 0.5593353429 | 0.6045582004 | -0.8888047069 | 0.7383713449  | CG10654;rgr                   |  |
| positive regulatio 3/379  | 0.3516242786 | 0.4041292613 | 0.4981622631 | 0.5594274592 | -0.7048006704 | 0.7366520673  | SREBP;sug;Hr3                 |  |
| phosphate-conta 1/112     | 0.4647773272 | 0.5055838023 | 0.5469655416 | 0.5997363465 | -0.9053258927 | 0.6936578511  | mal                           |  |
| courtship behavi 1/109    | 0.4557156332 | 0.501089917  | 0.5372730911 | 0.5933363701 | -0.8666327341 | 0.6810747716  | w                             |  |
| male courtship bi 1/113   | 0.4677645415 | 0.5055838023 | 0.5501518454 | 0.5997363465 | -0.8823972563 | 0.670436811   | w                             |  |
| protein modificati 1/115  | 0.4736894914 | 0.5098183509 | 0.5564585858 | 0.6040191486 | -0.8755441642 | 0.654209448   | Ubi-p5E                       |  |
| cellular protein m 1/132  | 0.521483139  | 0.547341807  | 0.6066759417 | 0.6420653716 | -0.9709824597 | 0.632185645   | Ubi-p5E                       |  |
| DNA metabolic p 1/128     | 0.5106398246 | 0.5426883492 | 0.5953875132 | 0.6380946344 | -0.8892079649 | 0.597628476   | DNaseII                       |  |
| border follicle cel 1/121 | 0.4910749721 | 0.5262997591 | 0.5748624869 | 0.6187079308 | -0.8247007035 | 0.5864928906  | rk                            |  |
| negative regulati 1/132   | 0.521483139  | 0.547341807  | 0.6066759417 | 0.6420653716 | -0.898033346  | 0.5846900574  | sug                           |  |
| sensory percepti 1/130    | 0.516091579  | 0.5461969211 | 0.6010709279 | 0.6414790575 | -0.8834397089 | 0.5843697923  | lr25a                         |  |
| positive regulatio 2/305  | 0.5067500182 | 0.5408172463 | 0.6342633297 | 0.6684767043 | -0.7084976502 | 0.4815923916  | SREBP;Hr3                     |  |
| cellular macromol 1/166   | 0.6045413121 | 0.6319073797 | 0.690942053  | 0.7222192653 | -0.903779173  | 0.4548587454  | eEF1delta                     |  |
| central nervous s 1/170   | 0.6133205921 | 0.6358507363 | 0.6996063216 | 0.7253061456 | -0.9040317821 | 0.4419517492  | bwa                           |  |
| regulation of tran 4/630  | 0.4646077783 | 0.5055838023 | 0.6507779119 | 0.683047891  | -0.5579594589 | 0.4277103608  | sug;Hr3;GluRIIC;CG42741       |  |
| negative regulati 1/179   | 0.6323740493 | 0.6476734215 | 0.7182383452 | 0.7356150793 | -0.8748522579 | 0.4009222271  | sug                           |  |
| protein ubiquitina 1/168  | 0.6089553672 | 0.6339125543 | 0.6953044228 | 0.7238005057 | -0.7859127339 | 0.3898208131  | Ubi-p5E                       |  |
| chitin-based cutic 1/178  | 0.6303038103 | 0.6476734215 | 0.7162255005 | 0.7356150793 | -0.7805490175 | 0.3602650039  | Cpr47Ef                       |  |
| proteasome-med 1/178      | 0.6303038103 | 0.6476734215 | 0.7162255005 | 0.7356150793 | -0.753531773  | 0.3477951045  | Rpn7                          |  |
| sensory percepti 1/204    | 0.6805553048 | 0.694221074  | 0.7642429772 | 0.7795892218 | -0.6970398485 | 0.2682531295  | lr25a                         |  |
| vesicle-mediated 1/235    | 0.7316909688 | 0.7404362792 | 0.8111497961 | 0.8241281928 | -0.7266718012 | 0.227010111   | Hsc70-1                       |  |
| nervous system c 1/246    | 0.7478122849 | 0.7507680646 | 0.8254836514 | 0.832035109  | -0.700712841  | 0.2036294559  | pav                           |  |
| regulation of gen 2/458   | 0.7256124929 | 0.7372222928 | 0.8368486316 | 0.8401563337 | -0.6297000255 | 0.2019694591  | CG10654;rgr                   |  |
| negative regulati 1/245   | 0.746387278  | 0.7507680646 | 0.8242259995 | 0.832035109  | -0.6468226229 | 0.1892025215  | sug                           |  |
| cellular protein m 1/391  | 0.8889363915 | 0.8889363915 | 0.9390061869 | 0.9390061869 | -0.6093105294 | 0.07173388285 | Ubi-p5E                       |  |

## Molecular Function

| Term                 | Overlap | P-value        | Adjusted P-value | Old P-value    | Old Adjusted P-v | Z-score      | Combined Score | Genes                     |
|----------------------|---------|----------------|------------------|----------------|------------------|--------------|----------------|---------------------------|
| gamma-aminobu        | 2/9     | 0.001071339331 | 0.05737585913    | 0.002785653593 | 0.1430698561     | -3.512971309 | 24.02466874    | CG13795;CG13796           |
| gamma-aminobu        | 2/10    | 0.001334322305 | 0.05737585913    | 0.003327205957 | 0.1430698561     | -3.531313565 | 23.37493601    | CG13795;CG13796           |
| anion:cation sym     | 2/13    | 0.002287799146 | 0.07378152247    | 0.005219691178 | 0.1683350405     | -2.924969976 | 17.78430006    | CG13795;CG13796           |
| glutamate-gated      | 1/6     | 0.03284541638  | 0.1928852775     | 0.05036548825  | 0.2719152235     | -4.585082786 | 15.66238179    | GluRIIC                   |
| ligand-gated cati    | 3/35    | 0.000956807954 | 0.05737585913    | 0.002613876703 | 0.1430698561     | -2.145647054 | 14.91634062    | nAChRalpha3;Ir25a;GluRIIC |
| adenylate kinase     | 1/6     | 0.03284541638  | 0.1928852775     | 0.05036548825  | 0.2719152235     | -4.026924932 | 13.75574634    | Adk3                      |
| transmitter-gated    | 2/21    | 0.00598373337  | 0.1286502675     | 0.01211726741  | 0.2605212494     | -2.588013463 | 13.24729194    | nAChRalpha3;GluRIIC       |
| glycerophosphoc      | 1/6     | 0.03284541638  | 0.1928852775     | 0.05036548825  | 0.2719152235     | -3.832573923 | 13.09185436    | CG11619                   |
| protein-hormone      | 1/7     | 0.03821473511  | 0.1928852775     | 0.05735510325  | 0.2719152235     | -3.941281703 | 12.86644852    | rk                        |
| sodium:amino ac      | 2/19    | 0.004907808451 | 0.126621458      | 0.01015173927  | 0.2605212494     | -2.343169401 | 12.45846249    | CG13795;CG13796           |
| oxaloacetate trar    | 1/7     | 0.03821473511  | 0.1928852775     | 0.05735510325  | 0.2719152235     | -3.747367321 | 12.23340841    | Bmcp                      |
| ionotropic glutam    | 2/23    | 0.007157108519 | 0.1318952856     | 0.01423548792  | 0.262339706      | -2.476261849 | 12.23186491    | Ir25a;GluRIIC             |
| thiosulfate transn   | 1/7     | 0.03821473511  | 0.1928852775     | 0.05735510325  | 0.2719152235     | -3.715417445 | 12.12910695    | Bmcp                      |
| secondary active     | 2/25    | 0.008425684258 | 0.1358641587     | 0.01650171509  | 0.2660901558     | -2.474526025 | 11.81950078    | Bmcp;MCU                  |
| transaminase act     | 1/9     | 0.04886490887  | 0.1928852775     | 0.07118383168  | 0.2719152235     | -3.915364565 | 11.81929437    | Gabat                     |
| ligand-gated calc    | 1/8     | 0.04355451225  | 0.1928852775     | 0.06429443326  | 0.2719152235     | -3.69312156  | 11.57329003    | GluRIIC                   |
| maltose alpha-gli    | 1/11    | 0.05939820044  | 0.1928852775     | 0.08481423526  | 0.2719152235     | -3.718871702 | 10.50020228    | Mal-A4                    |
| endodeoxyribonu      | 1/8     | 0.04355451225  | 0.1928852775     | 0.06429443326  | 0.2719152235     | -3.210361388 | 10.06044422    | DNaseII                   |
| malate transmem      | 1/10    | 0.05414608515  | 0.1928852775     | 0.07802364949  | 0.2719152235     | -3.340454527 | 9.740997911    | Bmcp                      |
| oxidoreductase a     | 1/9     | 0.04886490887  | 0.1928852775     | 0.07118383168  | 0.2719152235     | -3.225023115 | 9.73536357     | Dhod                      |
| alpha-glucosidas     | 1/11    | 0.05939820044  | 0.1928852775     | 0.08481423526  | 0.2719152235     | -3.350622282 | 9.460453025    | Mal-A4                    |
| kainate selective    | 1/10    | 0.05414608515  | 0.1928852775     | 0.07802364949  | 0.2719152235     | -3.160326493 | 9.215732027    | GluRIIC                   |
| potassium chann      | 2/33    | 0.01440828704  | 0.1928852775     | 0.02695640804  | 0.2719152235     | -1.999223831 | 8.476612578    | CG42340;GluRIIC           |
| alpha-amylase ac     | 1/13    | 0.06981588103  | 0.1928852775     | 0.09824909306  | 0.2719152235     | -3.1571362   | 8.403961192    | Mal-A4                    |
| neurotransmitter     | 1/11    | 0.05939820044  | 0.1928852775     | 0.08481423526  | 0.2719152235     | -2.93349861  | 8.282707948    | GluRIIC                   |
| excitatory extracr   | 1/12    | 0.06462141319  | 0.1928852775     | 0.09155593519  | 0.2719152235     | -2.990543133 | 8.191724008    | nAChRalpha3               |
| succinate transm     | 1/11    | 0.05939820044  | 0.1928852775     | 0.08481423526  | 0.2719152235     | -2.878630895 | 8.127789427    | Bmcp                      |
| amylase activity (   | 1/14    | 0.07498176072  | 0.1928852775     | 0.1048940503   | 0.2719152235     | -2.975621421 | 7.708378195    | Mal-A4                    |
| nucleobase-conti     | 1/8     | 0.04355451225  | 0.1928852775     | 0.06429443326  | 0.2719152235     | -2.424703493 | 7.5983951      | Adk3                      |
| hydrolase activity   | 2/41    | 0.02174354883  | 0.1928852775     | 0.03942938149  | 0.2719152235     | -1.892942677 | 7.247013999    | CG10505;w                 |
| potassium ion lea    | 1/12    | 0.06462141319  | 0.1928852775     | 0.09155593519  | 0.2719152235     | -2.64026003  | 7.232225223    | CG42340                   |
| glutamate recept     | 1/15    | 0.08011920815  | 0.1928852775     | 0.1114911461   | 0.2719152235     | -2.79000675  | 7.042645666    | GluRIIC                   |
| acetylcholine-gat    | 1/11    | 0.05939820044  | 0.1928852775     | 0.08481423526  | 0.2719152235     | -2.488914948 | 7.027429824    | nAChRalpha3               |
| AMPA glutamate       | 1/12    | 0.06462141319  | 0.1928852775     | 0.09155593519  | 0.2719152235     | -2.549524208 | 6.983680803    | Ir25a                     |
| hydrolase activity   | 2/46    | 0.02695818018  | 0.1928852775     | 0.0481355811   | 0.2719152235     | -1.929817421 | 6.973334452    | CG17110;bwa               |
| disulfide oxidorec   | 1/15    | 0.08011920815  | 0.1928852775     | 0.1114911461   | 0.2719152235     | -2.590891957 | 6.540032211    | GILT2                     |
| antipporter activity | 1/15    | 0.08011920815  | 0.1928852775     | 0.1114911461   | 0.2719152235     | -2.576026748 | 6.50250886     | Bmcp                      |
| glutathione trans    | 2/41    | 0.02174354883  | 0.1928852775     | 0.03942938149  | 0.2719152235     | -1.686871176 | 6.458081998    | GstD9;GstT4               |
| leak channel acti    | 1/12    | 0.06462141319  | 0.1928852775     | 0.09155593519  | 0.2719152235     | -2.31785806  | 6.349098701    | CG42340                   |
| ATPase activity, (   | 2/48    | 0.0291714224   | 0.1928852775     | 0.05179768182  | 0.2719152235     | -1.766624872 | 6.244251738    | CG10505;w                 |
| ATPase activity, (   | 2/44    | 0.02481680305  | 0.1928852775     | 0.04457429143  | 0.2719152235     | -1.649963576 | 6.098651983    | CG10505;w                 |
| sulfate transmem     | 1/16    | 0.08522837843  | 0.1928852775     | 0.1180407172   | 0.2719152235     | -2.45239633  | 6.038831784    | Bmcp                      |
| tRNA binding (Gc     | 1/15    | 0.08011920815  | 0.1928852775     | 0.1114911461   | 0.2719152235     | -2.321798327 | 5.860775399    | mIF2                      |
| aminoacylase ac      | 1/7     | 0.03821473511  | 0.1928852775     | 0.05735510325  | 0.2719152235     | -1.789333036 | 5.841338716    | CG17110                   |
| endodeoxyribonu      | 1/16    | 0.08522837843  | 0.1928852775     | 0.1180407172   | 0.2719152235     | -2.306250179 | 5.678958457    | DNaseII                   |
| nucleotide kinase    | 1/13    | 0.06981588103  | 0.1928852775     | 0.09824909306  | 0.2719152235     | -2.088867303 | 5.560342866    | Adk3                      |
| C4-dicarboxylate     | 1/16    | 0.08522837843  | 0.1928852775     | 0.1180407172   | 0.2719152235     | -2.236459696 | 5.50710492     | Bmcp                      |
| transmitter-gated    | 1/16    | 0.08522837843  | 0.1928852775     | 0.1180407172   | 0.2719152235     | -2.220393763 | 5.467543831    | GluRIIC                   |
| deoxyribonucleas     | 1/10    | 0.05414608515  | 0.1928852775     | 0.07802364949  | 0.2719152235     | -1.794800757 | 5.233763934    | DNaseII                   |
| acetylcholine rec    | 1/14    | 0.07498176072  | 0.1928852775     | 0.1048940503   | 0.2719152235     | -2.009358892 | 5.205265079    | nAChRalpha3               |
| metalloaminopep      | 1/18    | 0.09536250357  | 0.2005049568     | 0.1309986206   | 0.2775526074     | -2.167058975 | 5.092739901    | Psa                       |
| P-P-bond-hydroly     | 2/60    | 0.0438601102   | 0.1928852775     | 0.07569291182  | 0.2719152235     | -1.624445921 | 5.079236322    | CG10505;w                 |
| translation factor   | 2/68    | 0.05487037915  | 0.1928852775     | 0.09321606032  | 0.2719152235     | -1.610472694 | 4.674850532    | mIF2;eEF1delta            |
| fatty acid elonga    | 1/21    | 0.1103554414   | 0.2005049568     | 0.1500873273   | 0.2805980467     | -2.06267322  | 4.546232511    | CG9458                    |
| phosphotransfer      | 1/18    | 0.09536250357  | 0.2005049568     | 0.1309986206   | 0.2775526074     | -1.909127727 | 4.486583457    | Adk3                      |
| proteasome bind      | 1/17    | 0.09030942576  | 0.1974562021     | 0.1245430979   | 0.2770010282     | -1.798851478 | 4.325362558    | Ubi-p5E                   |
| translation elong    | 1/17    | 0.09030942576  | 0.1974562021     | 0.1245430979   | 0.2770010282     | -1.787125925 | 4.297168308    | eEF1delta                 |
| hydro-lyase activ    | 1/24    | 0.1251020967   | 0.2180833847     | 0.1687660513   | 0.3023725086     | -2.065570963 | 4.293547654    | Irp-1A                    |
| glucose transmei     | 1/21    | 0.1103554414   | 0.2005049568     | 0.1500873273   | 0.2805980467     | -1.945554651 | 4.288097466    | Tret1-1                   |
| inorganic anion t    | 1/21    | 0.1103554414   | 0.2005049568     | 0.1500873273   | 0.2805980467     | -1.939230538 | 4.274158812    | Bmcp                      |
| fatty acid synthes   | 1/24    | 0.1251020967   | 0.2180833847     | 0.1687660513   | 0.3023725086     | -2.026803458 | 4.212964545    | CG9458                    |
| organic anion tra    | 1/19    | 0.1003877644   | 0.2005049568     | 0.137407615    | 0.2805980467     | -1.790322587 | 4.115441292    | w                         |
| hexose transfer      | 1/21    | 0.1103554414   | 0.2005049568     | 0.1500873273   | 0.2805980467     | -1.854251046 | 4.086859862    | Tret1-1                   |

|                      |       |               |              |               |              |               |               |                        |  |
|----------------------|-------|---------------|--------------|---------------|--------------|---------------|---------------|------------------------|--|
| cation:sugar sym     | 1/21  | 0.1103554414  | 0.2005049568 | 0.1500873273  | 0.2805980467 | -1.818838051  | 4.008807893   | Tret1-1                |  |
| cholesterol transj   | 1/13  | 0.06981588103 | 0.1928852775 | 0.09824909306 | 0.2719152235 | -1.438353248  | 3.828743555   | w                      |  |
| endonuclease ac      | 1/26  | 0.1347983592  | 0.2250665862 | 0.1809950225  | 0.3113114387 | -1.878020512  | 3.76350663    | DNasell                |  |
| metalloendopepti     | 1/24  | 0.1251020967  | 0.2180833847 | 0.1687660513  | 0.3023725086 | -1.777562526  | 3.694886087   | CG7791                 |  |
| RNA polymerase 3/127 |       | 0.03378696855 | 0.1928852775 | 0.06962641113 | 0.2719152235 | -1.051288337  | 3.561428575   | CG10654;sug;Hr3        |  |
| phosphoric diestk    | 1/16  | 0.08522837843 | 0.1928852775 | 0.1180407172  | 0.2719152235 | -1.38204613   | 3.403179166   | CG11619                |  |
| solute:proton syn    | 1/25  | 0.1299636138  | 0.2235374158 | 0.1749026778  | 0.309074595  | -1.649374234  | 3.36554938    | Tret1-1                |  |
| oxidoreductase a     | 1/27  | 0.1396064789  | 0.2279650098 | 0.1870433976  | 0.3133584194 | -1.693838696  | 3.335045893   | CG8665                 |  |
| extracellular ligar  | 1/29  | 0.1491434215  | 0.2375247083 | 0.199009477   | 0.3209027817 | -1.634216176  | 3.109663145   | nAChRalpha3            |  |
| fatty acid ligase ε  | 1/26  | 0.1347983592  | 0.2250665862 | 0.1809950225  | 0.3113114387 | -1.545862531  | 3.097870257   | CG4830                 |  |
| sterol transporter   | 1/16  | 0.08522837843 | 0.1928852775 | 0.1180407172  | 0.2719152235 | -1.248316821  | 3.07388133    | w                      |  |
| calcium ion trans    | 1/29  | 0.1491434215  | 0.2375247083 | 0.199009477   | 0.3209027817 | -1.580390766  | 3.00724163    | MCU                    |  |
| calcium channel      | 1/32  | 0.1632527498  | 0.2568244479 | 0.2166365053  | 0.3450136936 | -1.653671262  | 2.997205849   | MCU                    |  |
| L-amino acid tran    | 1/35  | 0.1771301833  | 0.2688211017 | 0.2338842499  | 0.3635068462 | -1.687793148  | 2.921351062   | Mal-A4                 |  |
| sugar:proton sym     | 1/21  | 0.1103554414  | 0.2005049568 | 0.1500873273  | 0.2805980467 | -1.28768251   | 2.838115138   | Tret1-1                |  |
| ligand-gated ion     | 2/84  | 0.07936382221 | 0.1928852775 | 0.1312458066  | 0.2775526074 | -1.033599813  | 2.618844926   | nAChRalpha3;lr25a      |  |
| metallopeptidase     | 1/36  | 0.1817051169  | 0.2725576754 | 0.239550596   | 0.3678812724 | -1.49934315   | 2.556935041   | CG7791                 |  |
| microtubule motc     | 1/33  | 0.1679041393  | 0.2609594454 | 0.2224274989  | 0.3499164312 | -1.368778865  | 2.442397078   | pav                    |  |
| monocarboxylic ε     | 1/21  | 0.1103554414  | 0.2005049568 | 0.1500873273  | 0.2805980467 | -0.9893032384 | 2.180472652   | Sln                    |  |
| aminopeptidase ε     | 1/38  | 0.1907794993  | 0.2828799472 | 0.250760686   | 0.376141029  | -1.305874104  | 2.163359322   | Psa                    |  |
| motor activity (G)   | 1/40  | 0.1997541489  | 0.2831679694 | 0.2618092251  | 0.3785858269 | -1.32480164   | 2.133815507   | pav                    |  |
| metalloexopeptid     | 1/39  | 0.1952792225  | 0.2831679694 | 0.2563050065  | 0.3785858269 | -1.249448675  | 2.04075555    | Psa                    |  |
| RNA polymerase 3/200 |       | 0.1001850451  | 0.2005049568 | 0.1864966109  | 0.3133584194 | -0.8796780647 | 2.023907301   | CG10654;sug;Hr3        |  |
| ATP binding (GO)     | 1/40  | 0.1997541489  | 0.2831679694 | 0.2618092251  | 0.3785858269 | -1.254043933  | 2.019848338   | Hsc70-1                |  |
| neuropeptide rec     | 1/45  | 0.2217615425  | 0.2919106018 | 0.2887386392  | 0.3879925464 | -1.284769839  | 1.935059443   | rk                     |  |
| sodium channel ε     | 1/45  | 0.2217615425  | 0.2919106018 | 0.2887386392  | 0.3879925464 | -1.255047669  | 1.89029332    | GluRIIC                |  |
| transcription regu   | 3/204 | 0.1047241908  | 0.2005049568 | 0.1939813164  | 0.3208152541 | -0.8125949056 | 1.833559573   | CG10654;sug;Hr3        |  |
| translation initiati | 1/48  | 0.2346769711  | 0.3027332927 | 0.3044329015  | 0.3966852959 | -1.263934759  | 1.832130691   | mlf2                   |  |
| carboxylic acid tr   | 1/42  | 0.2086301522  | 0.2919106018 | 0.2726984882  | 0.3865725821 | -1.123604645  | 1.760904437   | Sln                    |  |
| ubiquitin protein I  | 1/44  | 0.2174085836  | 0.2919106018 | 0.2834307186  | 0.3879925464 | -1.151862702  | 1.757715786   | Ubi-p5E                |  |
| G-protein couple     | 1/48  | 0.2346769711  | 0.3027332927 | 0.3044329015  | 0.3966852959 | -1.200207862  | 1.739755667   | rk                     |  |
| ubiquitin-like prot  | 1/45  | 0.2217615425  | 0.2919106018 | 0.2887386392  | 0.3879925464 | -1.153057458  | 1.736680498   | Ubi-p5E                |  |
| amino acid transi    | 1/50  | 0.2431690188  | 0.3105822121 | 0.3147071884  | 0.4059722731 | -1.178755476  | 1.666758506   | Mal-A4                 |  |
| adenyl ribonuclec    | 1/43  | 0.2130314977  | 0.2919106018 | 0.2780840934  | 0.3879925464 | -0.9488968048 | 1.467293598   | Hsc70-1                |  |
| transcription fact   | 2/134 | 0.1705613025  | 0.2619334289 | 0.2641296467  | 0.3785858269 | -0.7593987085 | 1.3431185     | SREBP;CG42741          |  |
| nucleoside-triphc    | 3/230 | 0.1360867731  | 0.2250665862 | 0.2443101777  | 0.3707766226 | -0.5510886593 | 1.099125698   | pav;mlf2;Hsc70-1       |  |
| olfactory receptor   | 1/71  | 0.326887382   | 0.3940978718 | 0.4140184996  | 0.5126688242 | -0.9721148597 | 1.086960086   | lr25a                  |  |
| transcriptional rej  | 1/60  | 0.2842486216  | 0.3575197724 | 0.3638946108  | 0.4616687429 | -0.8519856378 | 1.071717842   | CG42741                |  |
| ATPase activity (    | 2/148 | 0.1984890905  | 0.2831679694 | 0.3025476716  | 0.3966852959 | -0.6512279346 | 1.053049337   | pav;Hsc70-1            |  |
| ligand-gated char    | 1/61  | 0.2882329948  | 0.3575197724 | 0.3686192288  | 0.4616687429 | -0.8053458277 | 1.001839028   | lr25a                  |  |
| transcriptional ac   | 1/76  | 0.3454269877  | 0.4088080864 | 0.4355057157  | 0.5154150214 | -0.8270477788 | 0.8791302704  | SREBP                  |  |
| transcriptional rej  | 1/73  | 0.3343648561  | 0.3993802448 | 0.4227076323  | 0.5126688242 | -0.7056187672 | 0.7730212349  | CG42741                |  |
| sequence-specifi     | 2/197 | 0.2987868406  | 0.3636179475 | 0.4329065022  | 0.5154150214 | -0.6167230575 | 0.7450167898  | CG10654;CG42741        |  |
| endopeptidase a      | 3/290 | 0.218057799   | 0.2919106018 | 0.3660488194  | 0.4616687429 | -0.4751105449 | 0.7235910404  | CG7791;CG18754;CG14990 |  |
| cation channel α     | 1/86  | 0.3810014049  | 0.4427854165 | 0.4761952272  | 0.5534160749 | -0.740925791  | 0.7149579841  | MCU                    |  |
| transcriptional ac   | 1/93  | 0.4047567374  | 0.4614570767 | 0.5029575636  | 0.572485512  | -0.7382835443 | 0.6677546091  | SREBP                  |  |
| serine-type endo     | 2/191 | 0.2864738497  | 0.3575197724 | 0.4175173559  | 0.5126688242 | -0.4655021005 | 0.58192791    | CG18754;CG14990        |  |
| RNA polymerase       | 1/92  | 0.4014192619  | 0.4614570767 | 0.4992178462  | 0.572485512  | -0.6179434407 | 0.5640271691  | CG10654                |  |
| core promoter pn     | 1/95  | 0.4113764637  | 0.4614570767 | 0.5103553014  | 0.572485512  | -0.6155589372 | 0.5467680798  | CG10654                |  |
| purine ribonuclec    | 1/94  | 0.408075771   | 0.4614570767 | 0.5066699838  | 0.572485512  | -0.6004594853 | 0.5381932829  | Hsc70-1                |  |
| G-protein couple     | 1/102 | 0.4339761362  | 0.4826113929 | 0.5354097213  | 0.5954125349 | -0.6290616371 | 0.525119098   | rk                     |  |
| sequence-specifi     | 1/111 | 0.4617734989  | 0.4923039782 | 0.5657881216  | 0.6031956007 | -0.6654691646 | 0.5141952267  | CG10654                |  |
| microtubule bindi    | 1/111 | 0.4617734989  | 0.4923039782 | 0.5657881216  | 0.6031956007 | -0.6461728129 | 0.4992853068  | pav                    |  |
| ATPase activity, ε   | 1/107 | 0.4495902059  | 0.4873708955 | 0.5525341429  | 0.5989655835 | -0.6167879813 | 0.4930718861  | Hsc70-1                |  |
| GTPase activity (    | 1/107 | 0.4495902059  | 0.4873708955 | 0.5525341429  | 0.5989655835 | -0.6091537369 | 0.4869689278  | mlf2                   |  |
| structural constit   | 1/107 | 0.4495902059  | 0.4873708955 | 0.5525341429  | 0.5989655835 | -0.5608976498 | 0.4483921063  | Cpr47Ef                |  |
| protein homodim      | 1/139 | 0.5398890115  | 0.5616587297 | 0.6484042915  | 0.6745496258 | -0.4933590383 | 0.3041024138  | Gal                    |  |
| transcription regu   | 1/137 | 0.5347029924  | 0.5607860652 | 0.6430518171  | 0.6744201985 | -0.4846378279 | 0.3034045271  | CG10654                |  |
| ion channel activ    | 1/83  | 0.3705351612  | 0.4345366891 | 0.4642992156  | 0.5444963529 | -0.2830987383 | 0.2810623911  | lr25a                  |  |
| serine-type pepti    | 2/194 | 0.2926335812  | 0.3595212569 | 0.4252369317  | 0.5126688242 | -0.1430144551 | 0.1757410291  | CG18754;CG14990        |  |
| mRNA binding (C      | 1/196 | 0.6658607939  | 0.6871683393 | 0.7719215822  | 0.7966230729 | -0.4288393269 | 0.1743980825  | Irp-1A                 |  |
| zinc ion binding (   | 1/211 | 0.6928865052  | 0.709383803  | 0.7966180668  | 0.8155851636 | -0.2742816888 | 0.1006309527  | Psa                    |  |
| DNA binding (GC      | 2/448 | 0.7142275811  | 0.7254752595 | 0.8541198778  | 0.8607926893 | -0.2905907063 | 0.09779935601 | CG10654;CG42741        |  |
| tubulin binding (C   | 1/120 | 0.4882174336  | 0.5162299093 | 0.5942223937  | 0.6283171212 | -0.1106882532 | 0.07936285897 | pav                    |  |

|                           |              |              |              |              |               |               |      |  |
|---------------------------|--------------|--------------|--------------|--------------|---------------|---------------|------|--|
| transition metal ic 1/242 | 0.7420642048 | 0.7478615814 | 0.8396614467 | 0.8528844616 | -0.1888608362 | 0.05634087214 | Psa  |  |
| RNA binding (GC 1/401     | 0.8950669492 | 0.8950669492 | 0.9536141946 | 0.9536141946 | -0.276173614  | 0.03061571201 | mIF2 |  |

# Cellular Component

| Term                                       | Overlap | P-value        | Adjusted P-value | Old P-value     | Old Adjusted P-value | Z-score       | Combined Score | Genes                                                                      |
|--------------------------------------------|---------|----------------|------------------|-----------------|----------------------|---------------|----------------|----------------------------------------------------------------------------|
| mitochondrion (C 12/465)                   |         | 0.000010652485 | 0.0005006686832  | 0.0000370467100 | 0.001741195378       | -1.169552712  | 13.3910479     | Prx2540-1;pr;CG3566;Adk3;mRpl45;CG10361;Dhod;mlF2;CG7791;Gabat;MCU;Hsc70-1 |
| mitotic spindle microtubule (C 1/8)        | 1/8     | 0.04355451225  | 0.2510401855     | 0.05915959992   | 0.3221322743         | -3.443827136  | 10.79206563    | pav                                                                        |
| female germline (C 1/10)                   | 1/10    | 0.05414608515  | 0.2510401855     | 0.0718368042    | 0.3221322743         | -3.673721823  | 10.71282854    | pav                                                                        |
| ionotropic glutamate receptor (C 2/25)     | 2/25    | 0.008425684258 | 0.1390334246     | 0.01396877378   | 0.3221322743         | -2.011535998  | 9.60804253     | lr25a;GluRIIC                                                              |
| BLOC-1 complex (C 1/10)                    | 1/10    | 0.05414608515  | 0.2510401855     | 0.0718368042    | 0.3221322743         | -3.276070158  | 9.553248611    | Muted                                                                      |
| kinetochore microtubule (C 1/14)           | 1/14    | 0.07498176072  | 0.2510401855     | 0.09669532196   | 0.3221322743         | -3.10016426   | 8.031007711    | pav                                                                        |
| AMPA glutamate receptor (C 1/13)           | 1/13    | 0.06981588103  | 0.2510401855     | 0.09054202034   | 0.3221322743         | -2.676795399  | 7.125345004    | lr25a                                                                      |
| acetylcholine-gate (C 1/11)                | 1/11    | 0.05939820044  | 0.2510401855     | 0.07811302365   | 0.3221322743         | -2.521044133  | 7.1181463      | nAChRalpha3                                                                |
| neurotransmitter (C 1/15)                  | 1/15    | 0.08011920815  | 0.2510401855     | 0.1028081726    | 0.3221322743         | -2.324549223  | 5.867719321    | GluRIIC                                                                    |
| mitochondrial intermembrane space (C 1/14) | 1/14    | 0.07498176072  | 0.2510401855     | 0.09669532196   | 0.3221322743         | -2.187262578  | 5.666126424    | Dhod                                                                       |
| polytene chromosome (C 1/15)               | 1/15    | 0.08011920815  | 0.2510401855     | 0.1028081726    | 0.3221322743         | -2.113184067  | 5.334183013    | Ubi-p5E                                                                    |
| integral component (C 7/419)               |         | 0.00887447391  | 0.1390334246     | 0.02146181499   | 0.3221322743         | -1.045196583  | 4.938110926    | CG42340;Tret1-1;Sin;nAChRalpha3;rk;TM4SF;GluRIIC                           |
| sensory dendrite (C 1/15)                  | 1/15    | 0.08011920815  | 0.2510401855     | 0.1028081726    | 0.3221322743         | -1.792250529  | 4.524069851    | lr25a                                                                      |
| intrinsic component (C 1/23)               | 1/23    | 0.1202136608   | 0.31188098       | 0.1502853889    | 0.3825088177         | -1.985627059  | 4.206520372    | MCU                                                                        |
| mitochondrial envelope (C 1/22)            | 1/22    | 0.1152981585   | 0.31188098       | 0.1444869854    | 0.3825088177         | -1.918944789  | 4.145369438    | Dhod                                                                       |
| cation channel (C 1/29)                    | 1/29    | 0.1491434215   | 0.31188098       | 0.1842824297    | 0.3825088177         | -2.023850251  | 3.851071712    | lr25a                                                                      |
| mitochondrial inner membrane (C 2/75)      |         | 0.06520951442  | 0.2510401855     | 0.09455084076   | 0.3221322743         | -1.396922669  | 3.81808277     | Bmcp;Dhod                                                                  |
| mitochondrial membrane (C 2/69)            |         | 0.06530881426  | 0.2510401855     | 0.08231280772   | 0.3221322743         | -1.318884548  | 3.794304492    | Adk3;Gabat                                                                 |
| nuclear speck (C 1/31)                     | 1/31    | 0.1585755948   | 0.31188098       | 0.1953182961    | 0.3825088177         | -1.996945438  | 3.677422672    | sug                                                                        |
| spindle midzone (C 1/29)                   | 1/29    | 0.1491434215   | 0.31188098       | 0.1842824297    | 0.3825088177         | -1.926201633  | 3.66526676     | pav                                                                        |
| kinesin complex (C 1/34)                   | 1/34    | 0.1725299038   | 0.31188098       | 0.2116006226    | 0.3825088177         | -2.035493138  | 3.576737403    | pav                                                                        |
| integral component (C 1/28)                | 1/28    | 0.1443881181   | 0.31188098       | 0.1787095007    | 0.3825088177         | -1.730989093  | 3.349897232    | MCU                                                                        |
| spindle microtubule (C 1/31)               | 1/31    | 0.1585755948   | 0.31188098       | 0.1953182961    | 0.3825088177         | -1.808514332  | 3.330422294    | pav                                                                        |
| vacuole (GO:000 1/32)                      |         | 0.1632527498   | 0.31188098       | 0.2007817024    | 0.3825088177         | -1.681234275  | 3.047162589    | Gal                                                                        |
| integral component (C 1/33)                |         | 0.1679041393   | 0.31188098       | 0.2062090676    | 0.3825088177         | -1.657257319  | 2.957147088    | MCU                                                                        |
| mitotic spindle (C 1/33)                   |         | 0.1679041393   | 0.31188098       | 0.2062090676    | 0.3825088177         | -1.579221946  | 2.817903727    | pav                                                                        |
| integral component (C 1/52)                |         | 0.251567678    | 0.4222743166     | 0.3027797667    | 0.5082374656         | -1.538073758  | 2.122608274    | CG9458                                                                     |
| mitochondrial lariat (C 1/50)              |         | 0.2431690188   | 0.4222743166     | 0.2931781845    | 0.5082374656         | -1.34262687   | 1.898472417    | mRpl45                                                                     |
| histone methyltransferase (C 1/57)         |         | 0.2721624036   | 0.4410907921     | 0.3262327301    | 0.5287220108         | -1.321725036  | 1.720035227    | rgr                                                                        |
| nuclear body (GC 1/62)                     |         | 0.292195387    | 0.4430059093     | 0.348918588     | 0.5290056011         | -1.320524301  | 1.624684052    | sug                                                                        |
| cytoplasmic vesicle (C 1/60)               |         | 0.2842486216   | 0.4430059093     | 0.3399347203    | 0.5290056011         | -1.144892318  | 1.440166912    | w                                                                          |
| microtubule (GO: 1/85)                     |         | 0.3775319622   | 0.5370748277     | 0.4440650624    | 0.6280834128         | -1.114173839  | 1.085316788    | pav                                                                        |
| polymeric cytoskeleton (C 1/90)            |         | 0.3946885787   | 0.5370748277     | 0.4628848627    | 0.6280834128         | -1.111172984  | 1.033011113    | pav                                                                        |
| microtubule organ (C 1/111)                |         | 0.4617734989   | 0.5601162661     | 0.5353899837    | 0.6490750503         | -1.183299026  | 0.9143124032   | pav                                                                        |
| microbody (GO: 1/94)                       |         | 0.408075771    | 0.5370748277     | 0.477493706     | 0.6280834128         | -0.9861880166 | 0.8839226945   | CG12355                                                                    |
| spindle (GO:000 1/95)                      |         | 0.4113764637   | 0.5370748277     | 0.4810851672    | 0.6280834128         | -0.9878359386 | 0.8774418284   | pav                                                                        |
| peroxisome (GO: 1/94)                      |         | 0.408075771    | 0.5370748277     | 0.477493706     | 0.6280834128         | -0.8981300641 | 0.8049961396   | CG12355                                                                    |
| centrosome (GO: 1/108)                     |         | 0.4526614112   | 0.5601162661     | 0.5256471276    | 0.6490750503         | -0.9200798992 | 0.729265329    | pav                                                                        |
| microtubule cytoskeleton (C 1/112)         |         | 0.4647773272   | 0.5601162661     | 0.5385941907    | 0.6490750503         | -0.8757521385 | 0.6709985337   | pav                                                                        |
| chromosomal region (C 1/132)               |         | 0.521483139    | 0.6127426883     | 0.5983500476    | 0.7303613059         | -0.802210578  | 0.5223019289   | Ubi-p5E                                                                    |
| nucleoplasm part (C 1/157)                 |         | 0.5840591404   | 0.6535899904     | 0.6625446518    | 0.7414190151         | -0.8181203507 | 0.4399467004   | rgr                                                                        |
| nucleolus (GO:0 1/157)                     |         | 0.5840591404   | 0.6535899904     | 0.6625446518    | 0.7414190151         | -0.7752851271 | 0.4169119289   | udd                                                                        |
| polytene chromosome (C 1/196)              |         | 0.6658607939   | 0.6954546069     | 0.7432711228    | 0.7939486994         | -0.6839953991 | 0.2781635885   | Ubi-p5E                                                                    |
| dendrite (GO:00 1/191)                     |         | 0.6563385909   | 0.6954546069     | 0.7340806498    | 0.7939486994         | -0.571838425  | 0.240788854    | lr25a                                                                      |
| nucleus (GO:000 9/1776)                    |         | 0.6614838377   | 0.6954546069     | 0.8996709494    | 0.9194502877         | -0.4134964727 | 0.170885575    | CG10654;SREBP;sug;pav;Ubi-p5E;Hr3;rgr;CG42741;Hsc70-1                      |
| cytosol (GO:000 2/573)                     |         | 0.8311494539   | 0.8492179203     | 0.9129256504    | 0.9194502877         | -0.4413525894 | 0.08162624243  | Prx2540-1;Hsc70-1                                                          |
| nuclear lumen (C 1/358)                    |         | 0.8660759166   | 0.8660759166     | 0.9194502877    | 0.9194502877         | -0.5446034084 | 0.07830455434  | udd                                                                        |
